# Supplementary material for: Development of New Emission Reallocation Method for Industrial Nonpoint Source in China
Source: Copernicus journal article supplement (doi:10.5194/acp-2020-1330), 2021-01-28
Supplement: Supplementary file 1 [file acp-2020-1330-supplement.pdf]

# Figures and Equations included in the Supplementary

## Figures:

Figure S1: a) satellite image of BE, b) regional satellite image of BE.

Figure S2: Time series of surface PM<sub>2.5</sub> at station CN\_1372A (23°02'22.2"N 113°06'18.0"E) – Foshan for January.

5

## Equation:

Eq (S1). Hit Rate

Eq (S2). False Detection Rate

Eq (S3). False Alarm Rate

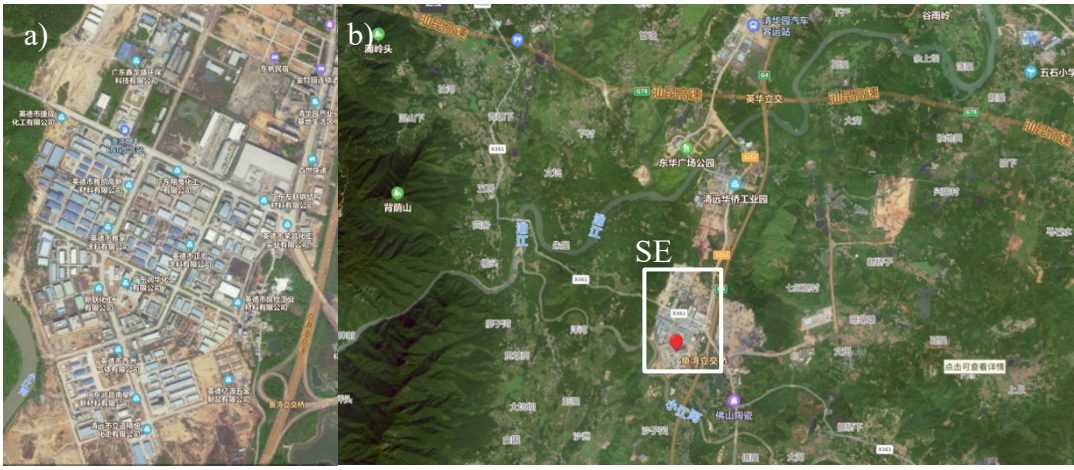

10

Figure S1: a) satellite image of BE (© Google Maps) and b) regional satellite image of BE (© Google Maps).

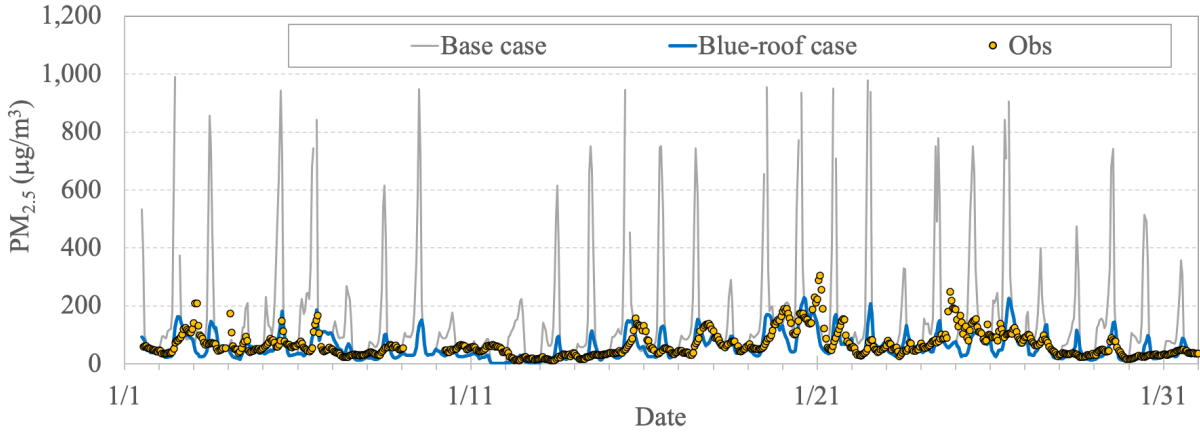

15

Figure S2: Time series of surface PM<sub>2.5</sub> at station CN\_1372A (23°02'22.2"N 113°06'18.0"E) – Foshan for January.

**Equations:**

$$HR = \frac{BR_A}{BR_T} \times 100\%, \tag{S1}$$

where  $HR$  is the total hit area,  $BR_A$  is the total blue roof area detected by the blue-roof algorithm,  $BR_T$  is the total “ground truth” (visually detected) blue roof area.

20

$$F_{DR} = \frac{BR_T - BR_A}{BR_A} \times 100\% \tag{S2}$$

where  $F_{DR}$  is the false detection rate,  $BR_A$  is the total blue roof area detected by the blue-roof algorithm,  $BR_T$  is the total “ground truth” (visually detected) blue roof area.

25

$$F_{AR} = \frac{BR_T - BR_A}{BR_T} \times 100\% \tag{S3}$$

where  $F_{AR}$  is the false detection rate,  $BR_A$  is the total blue roof area detected by the blue-roof algorithm,  $BR_T$  is the total “ground truth” (visually detected) blue roof area.
